# Supplementary material
Source: PubMed Central journal article supplement (PMC2919062)
Supplement: NIHMS157863-supplement-Response_to_comment.pdf [file NIHMS157863-supplement-Response_to_comment.pdf]

## Response to 'Adynamic Bone Disease and MICS'

*Kidney International* (2007) **71**, 1327; doi:10.1038/sj.ki.5002264

We appreciate the important thoughtful points raised by Dr Heaf<sup>1</sup> regarding adynamic bone disease (ABD). ABD may indeed be a secondary phenomenon and a consequence of the malnutrition-inflammation complex syndrome (MICS), which is also associated with hypoalbuminemia, increased serum levels of proinflammatory cytokines, protein-energy wasting, and poor outcome in maintenance dialysis patients.<sup>2</sup> A recent study in 44 chronic peritoneal dialysis patients showed that low serum albumin was associated with ABD.<sup>3</sup> Although we are not aware of any study that indicates a direct causal effect of inflammation on ABD in chronic kidney disease, *in vitro* parathyroid hormone (PTH) secretion is suppressed by interleukin-6,<sup>4</sup> a strong proinflammatory cytokine that is associated with poor outcome in maintenance-dialysis patients. Interleukin-1 beta (IL-1 $\beta$ ), another proinflammatory cytokine, may also suppress PTH secretion. In another *in vitro* study, PTH secretion from cultured parathyroid tissue slices was significantly inhibited in media containing IL-1 $\beta$ .<sup>5</sup> This effect may be mediated through the specific IL-1 receptors that upregulate the calcium-sensing receptor mRNA leading to apparent low bone turnover.<sup>5</sup> Indeed in the foregoing study, the inhibitory effect of IL-1 $\beta$  could be counteracted by the IL-1 receptor antagonist (IL-1ra),<sup>5</sup> indicating that the inflammation-induced suppression of PTH can potentially be overcome by treatment of MICS in individuals with chronic kidney disease. Hence, interventions that can improve hypoalbuminemia and kidney disease wasting by correcting malnutrition and/or by mitigating inflammation, for example, via IL-1ra *anakinra*, may be more promising approaches for the management of ABD rather than decreasing the dose of or withholding activated vitamin D analogs.

In our study, the MICS could indeed explain a large portion of the association between low PTH and increased death rate. However, in our epidemiologic study, inflammatory markers and cytokines were not measured. Hence, controlling for MICS was suboptimal, which may explain the existence of the residual association between low PTH and death after multivariate adjustment. Moreover, many patients with low PTH did not receive paricalcitol,<sup>6</sup> which may be another explanation for high mortality in this group. Nevertheless, any dose of paricalcitol is associated with better survival compared to no paricalcitol administration, including in those with low PTH levels.<sup>6</sup> As Dr Heaf suggested, we plan to perform additional subgroup analyses to examine more carefully the association of ABD and MICS in maintenance-dialysis patients.

K Kalantar-Zadeh has received honoraria from Abbott (manufacturer of calcitriol (calcijex) and paricalcitol (zemplar)).

1. Heaf J. Adynamic bone disease and MICS. *Kidney Int* 2007; in press.
2. Kalantar-Zadeh K, Ikizler TA, Block G *et al*. Malnutrition-inflammation complex syndrome in dialysis patients: causes and consequences. *Am J Kidney Dis* 2003; **42**: 864-881.
3. Sanchez-Gonzalez MC, Lopez-Barea F, Bajo MA *et al*. Serum albumin levels, an additional factor implicated in hyperparathyroidism outcome in peritoneal dialysis: a prospective study with paired bone biopsies. *Adv Perit Dial* 2006; **22**: 198-202.
4. Carlstedt E, Ridefelt P, Lind L *et al*. Interleukin-6 induced suppression of bovine parathyroid hormone secretion. *Biosci Rep* 1999; **19**: 35-42.
5. Nielsen PK, Rasmussen AK, Butters R *et al*. Inhibition of PTH secretion by interleukin-1 beta in bovine parathyroid glands *in vitro* is associated with an up-regulation of the calcium-sensing receptor mRNA. *Biochem Biophys Res Commun* 1997; **238**: 880-885.
6. Lee GH, Benner D, Regidor DL, Kalantar-Zadeh K. Impact of kidney bone disease and its management on survival of patients on dialysis. *J Ren Nutr* 2007; **17**: 38-44.

K Kalantar-Zadeh<sup>1,2</sup> and JD Kopple<sup>1,2,3</sup>

<sup>1</sup>Division of Nephrology and Hypertension, Los Angeles Biomedical Research Institute at Harbor-UCLA Medical Center, Torrance, California, USA; <sup>2</sup>David Geffen School of Medicine at UCLA, Los Angeles, California, USA and <sup>3</sup>UCLA School of Public Health, Los Angeles, California, USA

Correspondence: K Kalantar-Zadeh, Division of Nephrology and Hypertension, Harbor-UCLA Medical Center, 1124 West Carson Street, Torrance, California 90502. E-mail: kamka@ucla.edu

## Don't be so BOLD: Potential limitations in the use of BOLD MRI for studies of renal oxygenation

*Kidney International* (2007) **71**, 1327-1328; doi:10.1038/sj.ki.5002321

**To the Editor:** Blood oxygen level-dependent contrast magnetic resonance imaging is used for studies of intrarenal oxygenation<sup>1</sup> and has been touted as a useful non-invasive diagnostic tool in renal medicine. The validity of this technique as an indicator of parenchymal oxygenation, however, relies on the assumption that tissue oxygenation varies with blood oxygenation. We recently found that in both rabbits and rats renal cortical and medullary tissue  $pO_2$  can remain remarkably stable in the face of changes in renal blood flow,<sup>2</sup> even if renal oxygen consumption does not change.<sup>3</sup> We also observed increased renal venous blood oxygen content with increasing renal blood flow, despite stable tissue  $pO_2$ .<sup>3</sup> These observations support the concept that diffusional shunting of oxygen from arteries to veins increases with increased renal blood flow and so contributes to dynamic regulation of renal oxygenation.<sup>3</sup> The possibility that similar mechanisms operate in the human kidney raises concerns over the reliability of clinical assessment of renal tissue oxygenation using blood oxygen level-dependent magnetic resonance imaging. Our data indicate that changes in the oxygen level of blood in the renal circulation, as evidence by altered renal venous  $pO_2$ , do not necessarily reflect changes in tissue  $pO_2$ . The possibility that kidney vascular oxygenation and tissue oxygenation may vary

independently was suggested by Mason,<sup>1</sup> and our recent data<sup>3</sup> show that it actually occurs. We suggest that blood oxygen level-dependent magnetic resonance imaging requires further validation for use in estimating renal oxygenation. One possible approach would be to use newer functional magnetic resonance imaging techniques that employ extracellular  $pO_2$  reporter molecules.<sup>4</sup>

1. Mason RP. Non-invasive assessment of kidney oxygenation: role for BOLD MRI. *Kidney Int* 2006; **70**: 10–11.
2. O'Connor PM, Kett MM, Anderson WP, Evans RG. Renal medullary tissue oxygenation is dependent on both cortical and medullary blood flow. *Am J Physiol Renal Physiol* 2006; **290**: F688–F694.
3. Leong C-L, Anderson WP, O'Connor PM, Evans RG. Evidence that renal arterial-venous oxygen shunting contributes to dynamic regulation of renal oxygenation. *Am J Physiol Renal Physiol*, February 2007, doi:10.1152/ajprenal.00436.2006.
4. Kodibagkar VD, Cui W, Merritt ME, Mason RP. Novel  $^1H$  NMR approach to quantitative tissue oximetry using hexamethyldisiloxane. *Magn Reson Med* 2006; **55**: 743–748.

RG Evans<sup>1</sup>, C-L Leong<sup>1</sup>, WP Anderson<sup>1</sup> and PM O'Connor<sup>2</sup>

<sup>1</sup>Department of Physiology, Monash University, Melbourne, Australia and

<sup>2</sup>Department of Physiology, Medical College of Wisconsin, Milwaukee, Wisconsin, USA

Correspondence: RG Evans, Department of Physiology, PO Box 13F, Monash University, Victoria 3800, Australia. E-mail: roger.evans@med.monash.edu.au

## Response to 'Don't be so BOLD: Potential limitations in the use of BOLD MRI for studies of renal oxygenation'

*Kidney International* (2007) **71**, 1328; doi:10.1038/sj.ki.5002324

It is indeed gratifying that our caveats and concerns have been validated. We believe that the BOLD investigations can be very useful, since they are noninvasive, using blood as the reporter molecule. However, as the correspondents<sup>1</sup> recognize there is interplay of oxygen delivery, consumption, and clearance, and thus, assumptions are needed when inferring changes in tissue  $pO_2$ . Moreover, arteriovenous (AV) shunting may separate tissue and capillary phenomena from bulk AV measurements.

The correspondents cite their recent observations in rat and rabbit kidney cortex and medulla on the basis of polarographic electrodes, fluorescent fiber optic probes, and arterial and venous blood samples.<sup>2</sup> An MRI approach could be even more powerful by interrogating multiple locations simultaneously and providing quantitative  $pO_2$  based on reporter molecules, such as hexafluorobenzene<sup>3</sup> or hexamethyldisiloxane.<sup>4</sup> However, routine use in deep organs, such as kidney, has been hindered by difficulty in placing the exogenous reporter molecule, albeit using a very fine needle. We certainly encourage such investiga-

tions. In the meantime, it would be interesting to apply BOLD MRI to the models of Evans *et al.* The BOLD measurements would be expected to be sensitive to capillary oxygenation, which may or may not be associated with bulk venous blood following major shunting. It could also be valuable to apply both T1 and T2\* measurements, since these are attributable, respectively, to tissue<sup>5</sup> and vascular oxygenation.<sup>6</sup>

1. Evans RG, Leong C-L, Anderson WP, O'Connor PM. Don't be so BOLD: Potential limitations in the use of BOLD MRI for studies of renal oxygenation. *Kidney Int.* 2007, (in press).
2. Leong C-L, Anderson WP, O'Connor PM *et al.* Evidence that renal arterial-venous oxygen shunting contributes to dynamic regulation of renal oxygenation. *Am J Physiol Renal Physiol* 2006; in press (doi:10.1152/ajprenal.00436.2006).
3. Mason RP, Rodbumrung W, Antich PP. Hexafluorobenzene: a sensitive  $^{19}F$  NMR indicator of tumor oxygenation. *NMR Biomed* 1996; **9**: 125–134.
4. Kodibagkar VD, Cui W, Merritt ME *et al.* A novel  $^1H$  NMR approach to quantitative tissue oximetry using hexamethyldisiloxane. *Magn Reson Med* 2006; **55**: 743–748.
5. Matsumoto K, Bernardo M, Subramanian S *et al.* MR assessment of changes of tumor in response to hyperbaric oxygen treatment. *Magn Reson Med* 2006; **56**: 240–246.
6. Howe FA, Robinson SP, McIntyre DJ *et al.* Issues in flow and oxygenation dependent contrast (FLOOD) imaging of tumours. *NMR Biomed* 2001; **14**: 497–506.

RP Mason<sup>1</sup>

<sup>1</sup>Department of Radiology, University of Texas Southwestern Medical Center at Dallas, Harry Hines, Dallas, Texas, USA

Correspondence: RP Mason, Department of Radiology, University of Texas Southwestern Medical Center at Dallas, 5523 Harry Hines, Dallas, Texas 75390, USA. E-mail: ralph.mason@utsouthwestern.edu

## Does Sevelamer reduce mortality by slowing of progression of coronary calcification?

*Kidney International* (2007) **71**, 1328–1329; doi:10.1038/sj.ki.5002316

**To the Editor:** We found the *post hoc* survival analysis of Sevelamer in the incident hemodialysis patients thought provoking.<sup>1</sup> It is known from Dr Block's original study that, as compared to Calcium-containing binders, Sevelamer slowed the progression of coronary artery calcification (CAC) scores at 18 months.<sup>2</sup> The current analysis shows that mortality was predicted by phosphate binder use in the first 18 months (lower mortality with Sevelamer) and by 'baseline' CAC score, but not by CAC score at 18 months. This begs the question as to whether the slowing of progression of CAC score using Sevelamer has any direct effect on survival or is it possible that the survival benefit of Sevelamer is independent of effects on calcification? Since the patients underwent EBCT at regular intervals up to 18 months, the authors are in unique position to examine if change (delta) in CAC score at 18 months had any direct effect on survival.
